# Supplementary material for: Asymmetric transcriptomic signatures between the cob and florets in the maize ear under optimal- and low-nitrogen conditions at silking, and functional characterization of amino acid transporters ZmAAP4 and ZmVAAT3
Source: PubMed Central journal article supplement (PMC4588875; doi:10.1093/jxb/erv315), 2015-07-01
Supplement: supp_erv315_jexbot146183_file001.pdf [file supp_erv315_jexbot146183_file001.pdf]

**Fig.S1** Metabolism overview of the differentially expressed genes in the cob (A) and florets (B) under LN. The red and blue colors indicated up- or down-regulated expression under LN compared to control, respectively.

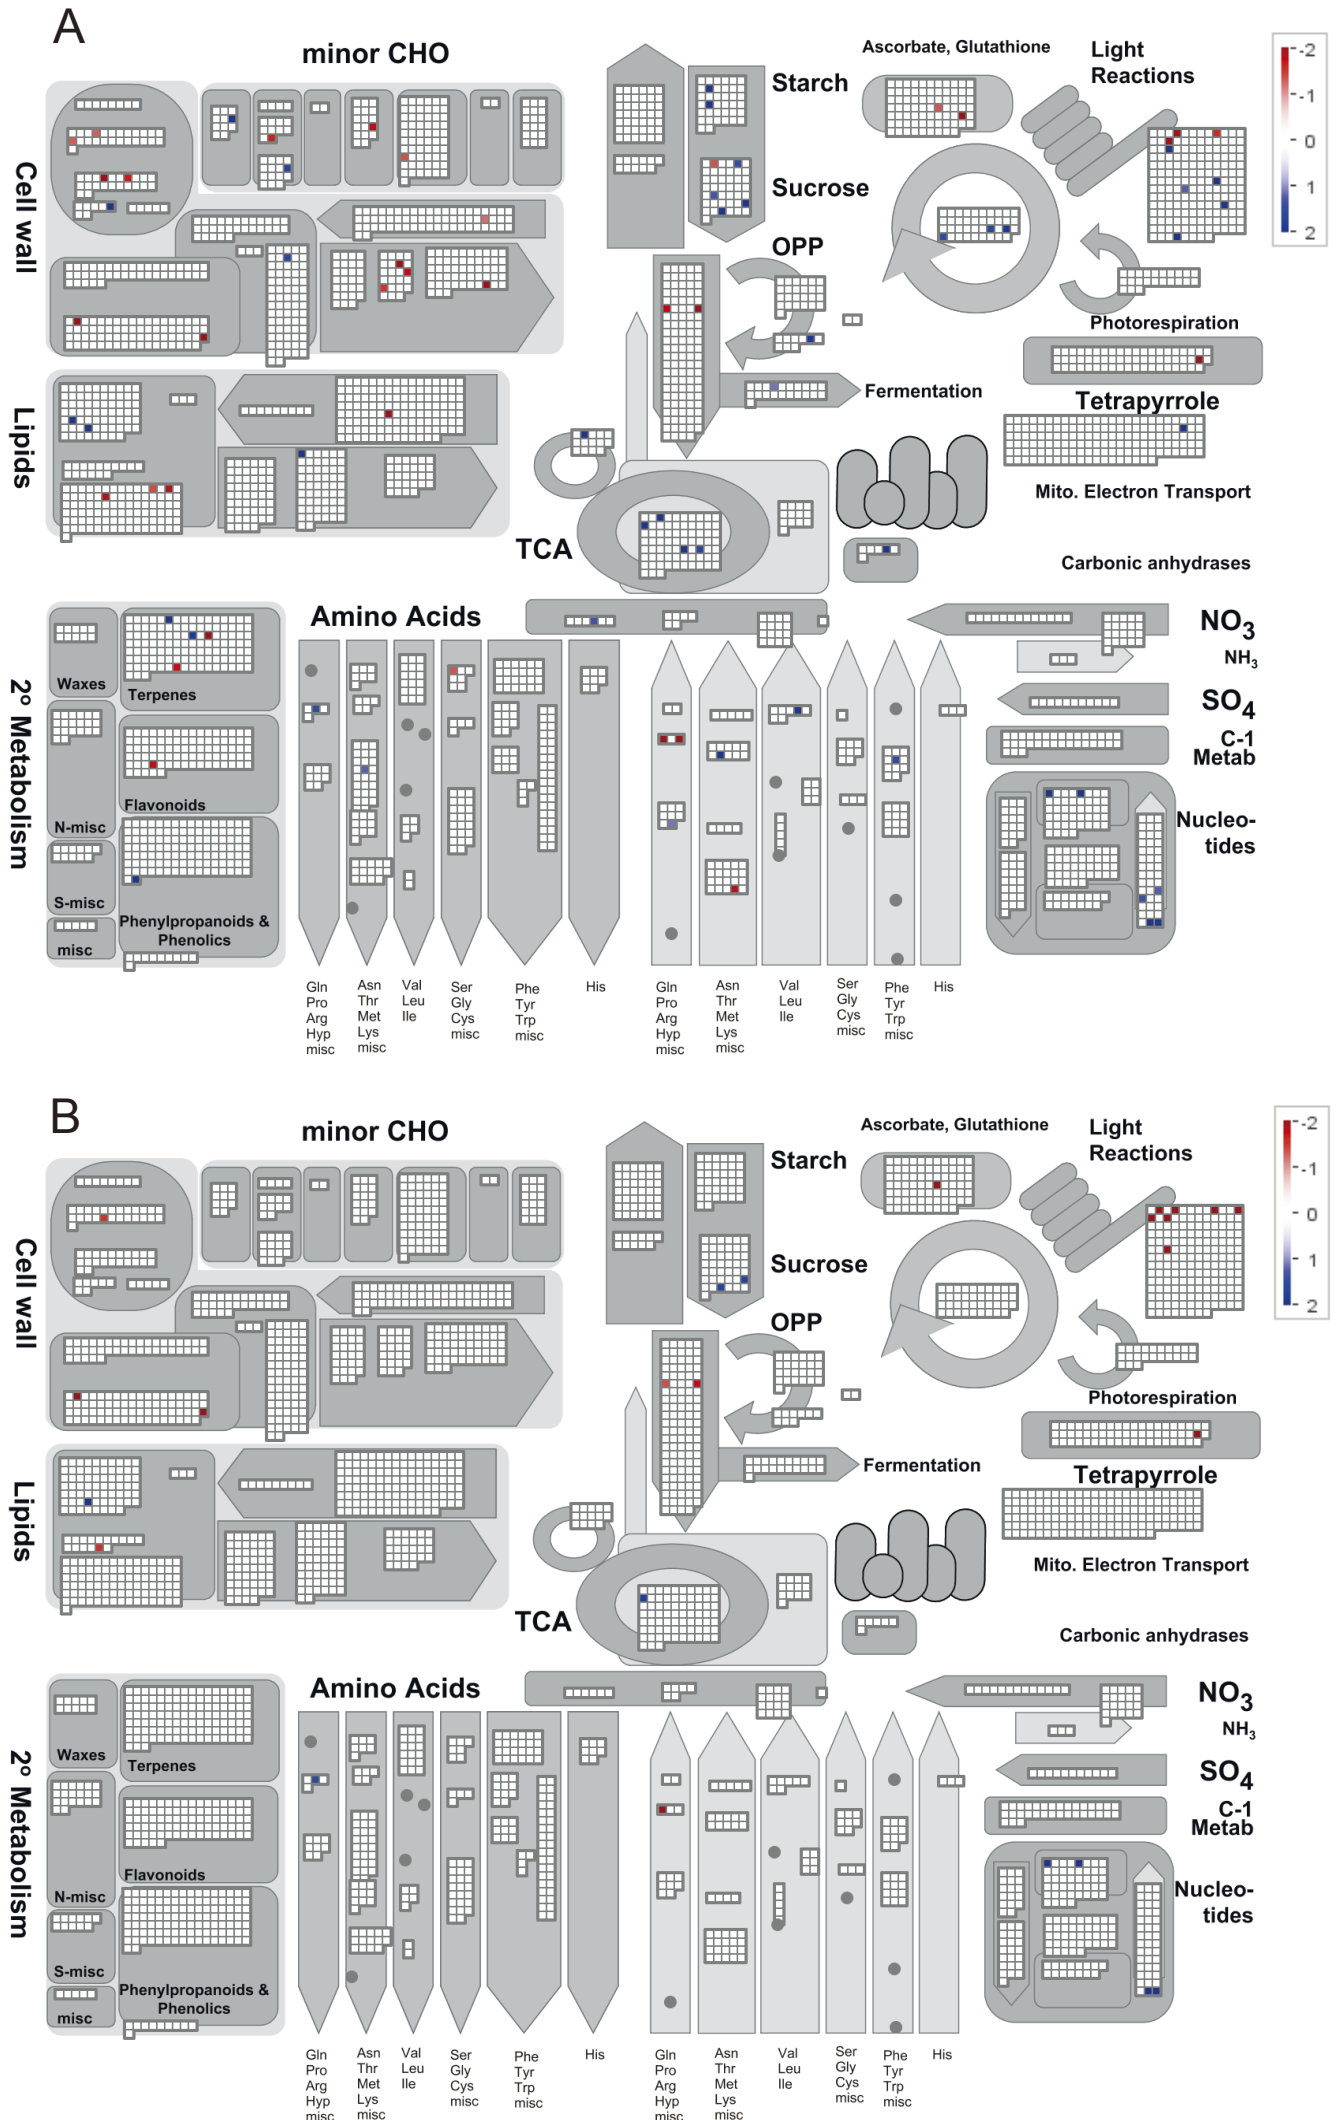

**Fig.S2** Transcription levels of *ZmAAP4* and *ZmVAAT3* in gene overexpression lines, with *AtTub4* as the control (Pfaffl, 2001). #1, #2, and #3 denoted three independent transgenic lines.

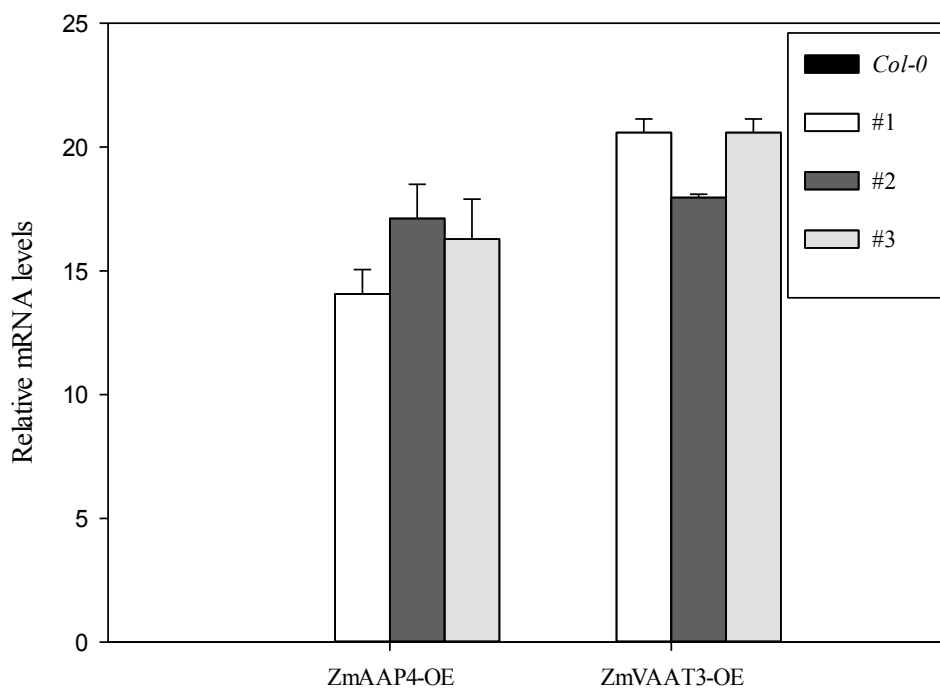

**Table S1.** *Fertilization practice among different nutrient treatments.*

| <b>Treatment</b> | <b>Before sowing</b> |                                   |                       | <b>V8</b> | <b>V12</b> | <b>Total (kg ha<sup>-1</sup>)</b> |          |                                   |                       |
|------------------|----------------------|-----------------------------------|-----------------------|-----------|------------|-----------------------------------|----------|-----------------------------------|-----------------------|
|                  | <b>N</b>             | <b>P<sub>2</sub>O<sub>5</sub></b> | <b>K<sub>2</sub>O</b> | <b>N</b>  | <b>N</b>   | <b>K<sub>2</sub>O</b>             | <b>N</b> | <b>P<sub>2</sub>O<sub>5</sub></b> | <b>K<sub>2</sub>O</b> |
| ON               | 60                   | 135                               | 80                    | 120       | 70         | 40                                | 250      | 135                               | 120                   |
| LN               |                      | 135                               | 80                    |           |            | 40                                | 0        | 135                               | 120                   |
| LP               | 60                   |                                   | 80                    | 120       | 70         | 40                                | 250      |                                   | 120                   |
| LK               | 60                   | 135                               |                       | 120       | 70         |                                   | 250      | 135                               |                       |

**Table S2.** *Primer sequences used for qRT-PCR.*

| <b>Gene ID</b> | <b>Forward primer (5'-3')</b> | <b>Reverse primer (5'-3')</b> |
|----------------|-------------------------------|-------------------------------|
| GRMZM2G432926  | AACCAGCGAAAGGCGTGGGAGG        | AAACTTGGAATGGAAGCCGATGAAA     |
| GRMZM2G072322  | GCCACCAGAGTGATGTTTGA          | GGGACGAGTAGCCGTTGAGC          |
| GRMZM2G400156  | TGCTGTGGATGCTGGAGAAC          | AAGAATGCCGAACGAAATGA          |
| GRMZM2G062129  | TCCAGGGATACTGAGGATGA          | AGGGAGCAGACTTCTATTTACAC       |
| GRMZM2G142680  | GTACCATCGTCCATCAATCCC         | CGACAACGACATCAACTACCG         |
| GRMZM2G001799  | TGGACCAGATCGGCAAGGAATG        | TGGCGACACGCACAACCTCAAAA       |
| GRMZM2G076345  | CGACTACTACGCCTGCTGAACTGC      | AAATCAAACCAACGAGCCAAAGC       |
| GRMZM2G437575  | TGAAGCCGTTTCGTGATTCCAAA       | TCGTTCGTCACCACATCCCACA        |
| GRMZM2G318780  | GCGGCAGACGGTAGCCAATAA         | CAAGGAGATGCTGGGCAACAGAG       |
| GRMZM2G311182  | TGCCTGGTCTGTACCGAGTTG         | GGAGAAGAGGATGGGCTTTGA         |
| GRMZM2G081192  | CTCAGCGACGGCTACTCCAA          | ATGAACACGGCGAACCCAAT          |
| GRMZM2G051619  | CGTGGAGGGAGTACAAGAA           | GATGTGGTGCGACGATAGA           |
| GRMZM2G112377  | TCCTTTCTGTCTGGTGCTTGTG        | ACGGTGACCTCCGGTTATTTAG        |
| GRMZM2G161905  | ACGAGTATAGATGGCAAATGGGTCA     | TTGGCAAGGAGACGAACATAAGAAT     |

**Table S3.** *Total tags and genes generated by DGE sequencing.*

|           | <b>Protein coding</b> |              | <b>Pseudogene</b> |              | <b>Transposable element</b> |              |
|-----------|-----------------------|--------------|-------------------|--------------|-----------------------------|--------------|
|           | <b>Tags</b>           | <b>Genes</b> | <b>Tags</b>       | <b>Genes</b> | <b>Tags</b>                 | <b>Genes</b> |
| Sense     | 41,751,419            | 32,805       | 236,951           | 1,990        | 468,513                     | 1,974        |
| Antisense | 10,589,158            | 29,065       | 828,149           | 1,976        | 226,330                     | 1,700        |
| Total     | 52,340,577            | 61,870       | 1,065,100         | 3,966        | 694,843                     | 3,674        |

**Table S4.** DGE data verification by qRT-PCR.

| Gene ID       | Fold change<br>(Cob vs Floret) |         | Annotation                                                                                                           |
|---------------|--------------------------------|---------|----------------------------------------------------------------------------------------------------------------------|
|               | DGE                            | qRT-PCR |                                                                                                                      |
| GRMZM2G134888 | 5.0                            | 4.5     | Amino acid transporter family protein                                                                                |
| GRMZM2G162893 | 15.2                           | 16.3    | Ethylene-responsive protein -related                                                                                 |
| GRMZM2G413887 | 6.5                            | 6.2     | GRAM domain-containing protein / ABA-responsive protein-related                                                      |
| GRMZM2G475683 | 8.9                            | 8.8     | Auxin-responsive family protein                                                                                      |
| GRMZM2G108537 | 20                             | 19.2    | Nodulin MtN21 family protein                                                                                         |
| GRMZM2G179349 | 43.1                           | 46.6    | Nodulin MtN3 family protein                                                                                          |
| GRMZM2G045171 | 15.0                           | 16.7    | SUS6, ATSUS6   SUS6 (Sucrose Synthase 6)                                                                             |
| GRMZM2G085199 | 8.5                            | 8.7     | Ethylene-responsive protein -related                                                                                 |
| GRMZM2G078024 | 52.5                           | 54.6    | PROT1, ATPROT1   PROT1 (Proline Transporter 1); L-proline transmembrane transporter                                  |
| GRMZM2G019974 | 38.6                           | 41.4    | ATOCT2 ( <i>Arabidopsis Thaliana</i> Organic Cation/Carnitine Transporter 2)                                         |
| GRMZM2G432926 | 12.7                           | 13.8    | PIP2B, PIP2;2   PIP2B (Plasma Membrane Intrinsic Protein 2); water channel                                           |
| GRMZM2G113167 | 9.3                            | 9.1     | GRAM domain-containing protein / ABA-responsive protein-related                                                      |
| GRMZM2G175140 | 0.01                           | 0.01    | ATAMT1;2, AMT1;2   ATAMT1;2 (Ammonium Transporter 1;2)                                                               |
| GRMZM2G080843 | 0.01                           | 0.01    | Amino acid transporter family protein                                                                                |
| GRMZM2G453565 | 0.1                            | 0.1     | AtGH9C3   AtGH9C3 ( <i>Arabidopsis thaliana</i> glycosyl hydrolase 9C3); carbohydrate binding                        |
| GRMZM2G088861 | 0.01                           | 0.03    | Leucine-rich repeat protein, putative                                                                                |
| GRMZM2G005284 | 0.01                           | 0.02    | ARF10   ARF10 (Auxin Response Factor 10)                                                                             |
| GRMZM2G326707 | 0.1                            | 0.12    | ATPT2, PHT1;4   ATPT2 ( <i>Arabidopsis Thaliana</i> Phosphate Transporter 2); carbohydrate transmembrane transporter |
| GRMZM2G008792 | 0.2                            | 0.11    | ATCKX6, CKX6, ATCKX7   CKX6 (Cytokinin oxidase/dehydrogenase 6)                                                      |
| GRMZM2G333980 | 0.2                            | 0.18    | Polygalacturonase Inhibiting Protein 1                                                                               |

**Table S9.** Phenotypes of *ZmAAP4-OE* seedlings 12 days after transfer onto *ATS* medium supplemented with different amino acids and 3 mM  $\text{NO}_3^-$ 

| Treatment            | Primary root length (cm) |                    |                    |                    | Average rosette leaves per plant |                    |                    |                    |
|----------------------|--------------------------|--------------------|--------------------|--------------------|----------------------------------|--------------------|--------------------|--------------------|
|                      | <i>Col-0</i>             | <i>ZmAAP4-OE-1</i> | <i>ZmAAP4-OE-2</i> | <i>ZmAAP4-OE-3</i> | <i>Col-0</i>                     | <i>ZmAAP4-OE-1</i> | <i>ZmAAP4-OE-2</i> | <i>ZmAAP4-OE-3</i> |
| 3 mM $\text{NO}_3^-$ | 9.78 ± 0.11              | 9.92 ± 0.12        | 9.87 ± 0.21        | 9.83 ± 0.08        | 10.72 ± 0.11                     | 10.81 ± 0.13       | 10.91 ± 0.21       | 10.78 ± 0.14       |
| L-Gly (3 mM)         | 5.22 ± 0.12              | 4.12 ± 0.10*       | 4.32 ± 0.12*       | 4.25 ± 0.14*       | 7.94 ± 0.24                      | 7.07 ± 0.13 *      | 7.12 ± 0.17*       | 6.94 ± 0.14*       |
| L-Ala (3 mM)         | 7.50 ± 0.12              | 8.10 ± 0.13        | 8.10 ± 0.12        | 8.28 ± 0.12        | 9.08 ± 0.14                      | 7.24 ± 0.17**      | 7.43 ± 0.13**      | 7.33 ± 0.13**      |
| L-Val (300 μM)       | 6.71 ± 0.12              | 2.00 ± 0.13**      | 2.10 ± 0.11**      | 2.12 ± 0.12**      | 9.12 ± 0.14                      | 7.33 ± 0.17**      | 7.25 ± 0.15**      | 7.33 ± 0.13**      |
| L-Leu (300 μM)       | 3.52 ± 0.13              | 2.73 ± 0.12**      | 2.63 ± 0.14**      | 2.71 ± 0.14**      | 9.33 ± 0.11                      | 9.12 ± 0.12        | 9.22 ± 0.14        | 9.13 ± 0.15        |
| L-Ile (3 mM)         | 3.0 ± 0.12               | 0.9 ± 0.0**        | 1.1 ± 0.0**        | 0.9 ± 0.0**        | 11.11 ± 0.11                     | 9.07 ± 0.15**      | 9.33 ± 0.17**      | 9.42 ± 0.15**      |
| L-Ser (300 μM)       | 5.13 ± 0.12              | 5.53 ± 0.11        | 5.61 ± 0.11        | 5.54 ± 0.13        | 9.15 ± 0.13                      | 7.22 ± 0.13**      | 7.32 ± 0.13**      | 7.41 ± 0.13**      |
| L-Cys (3 mM)         | 6.10 ± 0.12              | 1.20 ± 0.0**       | 1.24 ± 0.12**      | 1.26 ± 0.0**       | 9.24 ± 0.14                      | 7.12 ± 0.17**      | 7.16 ± 0.17**      | 7.33 ± 0.17**      |
| L-Thr (300 μM)       | 4.82 ± 0.12              | 2.10 ± 0.12**      | 2.00 ± 0.10**      | 2.10 ± 0.10**      | 8.12 ± 0.11                      | 7.09 ± 0.13*       | 7.23 ± 0.17*       | 7.21 ± 0.15*       |
| L-Met (300 μM)       | 3.50 ± 0.12              | 1.00 ± 0.0**       | 1.00 ± 0.0**       | 1.00 ± 0.0**       | 10.23 ± 0.14                     | 11.12 ± 0.17*      | 11.21 ± 0.14*      | 11.33 ± 0.15*      |
| L-Pro (100 μM)       | 9.10 ± 0.12              | 8.32 ± 0.13        | 8.40 ± 0.12        | 8.28 ± 0.12        | 8.13 ± 0.11                      | 7.33 ± 0.15**      | 7.31 ± 0.17**      | 7.15 ± 0.13**      |
| L-Phe (300 μM)       | 6.10 ± 0.12              | 1.72 ± 0.11**      | 1.70 ± 0.11**      | 1.60 ± 0.10**      | 9.31 ± 0.14                      | 7.24 ± 0.17**      | 7.33 ± 0.13**      | 7.13 ± 0.15**      |
| L-Tyr (3 mM)         | 5.12 ± 0.12              | 5.22 ± 0.15        | 5.23 ± 0.21        | 5.33 ± 0.15        | 6.12 ± 0.22                      | 6.17 ± 0.12        | 6.24 ± 0.24        | 6.31 ± 0.22        |
| L-Trp (3 mM)         | 2.32 ± 0.12              | 2.13 ± 0.12        | 1.94 ± 0.12        | 2.12 ± 0.12        | 6.11 ± 0.23                      | 4.21 ± 0.22**      | 4.05 ± 0.21**      | 4.13 ± 0.16**      |
| L-His (300 μM)       | 4.22 ± 0.12              | 2.50 ± 0.12**      | 2.57 ± 0.12**      | 2.60 ± 0.10**      | 9.12 ± 0.11                      | 7.16 ± 0.15**      | 7.32 ± 0.14**      | 7.08 ± 0.14**      |
| L-Lys (300 μM)       | 2.30 ± 0.11              | 1.20 ± 0.08*       | 1.23 ± 0.12*       | 1.21 ± 0.21*       | 8.33 ± 0.14                      | 7.80 ± 0.17**      | 7.92 ± 0.17**      | 7.92 ± 0.15**      |
| L-Arg (300 μM)       | 7.21 ± 0.12              | 1.42 ± 0.14**      | 1.52 ± 0.13**      | 1.42 ± 0.12**      | 9.33 ± 0.14                      | 7.22 ± 0.14**      | 7.12 ± 0.14**      | 7.32 ± 0.14**      |
| L-Asp (3 mM)         | 7.10 ± 0.12              | 7.10 ± 0.10        | 7.12 ± 0.10        | 7.12 ± 0.13        | 6.13 ± 0.16                      | 6.15 ± 0.132       | 6.25 ± 0.21        | 6.35 ± 0.22        |
| L-Glu (3 mM)         | 12.10 ± 0.13             | 10.5 ± 0.10**      | 10.61 ± 0.10**     | 10.58 ± 0.13**     | 8.24 ± 0.11                      | 9.08 ± 0.12*       | 9.16 ± 0.17*       | 9.33 ± 0.15*       |
| L-Asn (300 μM)       | 8.40 ± 0.12              | 9.00 ± 0.13        | 9.10 ± 0.10        | 9.12 ± 0.13        | 9.24 ± 0.14                      | 10.10 ± 0.17*      | 10.12 ± 0.17*      | 10.00 ± 0.17*      |
| L-Gln (3 mM)         | 12.06 ± 0.12             | 10.00 ± 0.13**     | 10.10 ± 0.12**     | 10.08 ± 0.10**     | 8.11 ± 0.12                      | 7.12 ± 0.22*       | 7.25 ± 0.12*       | 7.33 ± 0.12*       |
| GABA (3 mM)          | 7.20 ± 0.12              | 6.70 ± 0.12        | 6.60 ± 0.10        | 6.70 ± 0.10        | 9.12 ± 0.14                      | 7.12 ± 0.12**      | 7.25 ± 0.00**      | 7.08 ± 0.00**      |
| L-Cit (100 μM)       | 9.21 ± 0.21              | 6.32 ± 0.12**      | 6.41 ± 0.15**      | 6.62 ± 0.20**      | 9.24 ± 0.08                      | 9.15 ± 0.10        | 9.08 ± 0.12        | 9.10 ± 0.22        |

| Treatment                         | Rosette diameter (cm) |             |             |             | Fresh weight per plant (g) |                    |                    |                    |
|-----------------------------------|-----------------------|-------------|-------------|-------------|----------------------------|--------------------|--------------------|--------------------|
|                                   | <i>Col-0</i>          | ZmAAP4-OE-1 | ZmAAP4-OE-2 | ZmAAP4-OE-3 | <i>Col-0</i>               | ZmAAP4-OE-1        | ZmAAP4-OE-2        | ZmAAP4-OE-3        |
| 3 mM NO <sub>3</sub> <sup>-</sup> | 2.3 ± 0.1             | 2.2 ± 0.1   | 2.3 ± 0.1   | 2.3 ± 0.1   | 0.0320 ± 0.001             | 0.0335 ± 0.0010    | 0.0348 ± 0.0010    | 0.0332 ± 0.0010    |
| L-Gly (3 mM)                      | 1.5 ± 0.1             | 0.9 ± 0.1*  | 0.9 ± 0.1*  | 0.9 ± 0.1*  | 0.0120 ± 0.003             | 0.0067 ± 0.0003**  | 0.0064 ± 0.0002**  | 0.0063 ± 0.0003**  |
| L-Ala (3 mM)                      | 2.1 ± 0.1             | 2.7 ± 0.1** | 2.6 ± 0.1** | 2.7 ± 0.1** | 0.0280 ± 0.001             | 0.0345 ± 0.0010**  | 0.0348 ± 0.0010**  | 0.0342 ± 0.0010**  |
| L-Val (300 μM)                    | 1.6 ± 0.1             | 0.8 ± 0.0** | 0.8 ± 0.0** | 0.8 ± 0.0** | 0.0253 ± 0.001             | 0.0190 ± 0.001**   | 0.0194 ± 0.001**   | 0.0189 ± 0.001**   |
| L-Leu (300 μM)                    | 2.2 ± 0.1             | 2.2 ± 0.1   | 2.2 ± 0.1   | 2.2 ± 0.1   | 0.0280 ± 0.001             | 0.0367 ± 0.002**   | 0.0353 ± 0.002**   | 0.0345 ± 0.001**   |
| L-Ile (3 mM)                      | 2.3 ± 0.1             | 0.8 ± 0.0** | 0.8 ± 0.0** | 0.8 ± 0.0** | 0.0250 ± 0.001             | 0.0073 ± 0.0003*** | 0.0070 ± 0.0004*** | 0.0075 ± 0.0003*** |
| L-Ser (300 μM)                    | 2.2 ± 0.1             | 1.8 ± 0.1** | 1.7 ± 0.1** | 1.6 ± 0.1** | 0.0300 ± 0.001             | 0.0257 ± 0.001**   | 0.0244 ± 0.001**   | 0.0252 ± 0.001**   |
| L-Cys (3 mM)                      | 2.0 ± 0.1             | 1.0 ± 0.0** | 1.0 ± 0.0** | 0.9 ± 0.0** | 0.0340 ± 0.001             | 0.0107 ± 0.002**   | 0.0112 ± 0.001**   | 0.0102 ± 0.002**   |
| L-Thr (300 μM)                    | 1.0 ± 0.1             | 0.9 ± 0.0   | 0.9 ± 0.0   | 0.9 ± 0.0   | 0.0233 ± 0.001             | 0.0100 ± 0.001**   | 0.0100 ± 0.001**   | 0.0100 ± 0.001**   |
| L-Met (300 μM)                    | 2.7 ± 0.1             | 1.6 ± 0.1** | 1.5 ± 0.1** | 1.6 ± 0.1** | 0.0267 ± 0.001             | 0.0143 ± 0.001**   | 0.0142 ± 0.001**   | 0.0146 ± 0.001**   |
| L-Pro (100 μM)                    | 1.6 ± 0.1             | 1.6 ± 0.1   | 1.6 ± 0.1   | 1.5 ± 0.1   | 0.029 ± 0.001              | 0.020 ± 0.002**    | 0.021 ± 0.001**    | 0.022 ± 0.001**    |
| L-Phe (300 μM)                    | 1.7 ± 0.1             | 1.2 ± 0.1*  | 1.1 ± 0.1*  | 1.2 ± 0.1*  | 0.0213 ± 0.001             | 0.0100 ± 0.001**   | 0.0120 ± 0.001**   | 0.0110 ± 0.001**   |
| L-Tyr (3 mM)                      | 1.6 ± 0.1             | 1.2 ± 0.1*  | 1.2 ± 0.1*  | 1.2 ± 0.1*  | 0.0067 ± 0.0002            | 0.0020 ± 0.0001**  | 0.0020 ± 0.0001**  | 0.0020 ± 0.0001**  |
| L-Trp (3 mM)                      | 0.8 ± 0.0             | 0.6 ± 0.0*  | 0.6 ± 0.0*  | 0.6 ± 0.0*  | 0.0067 ± 0.0002            | 0.0020 ± 0.0001**  | 0.0020 ± 0.0001**  | 0.0020 ± 0.0001**  |
| L-His (300 μM)                    | 1.7 ± 0.1             | 1.5 ± 0.1   | 1.5 ± 0.1   | 1.5 ± 0.1   | 0.0177 ± 0.001             | 0.0043 ± 0.0003**  | 0.0045 ± 0.0003**  | 0.0042 ± 0.0003**  |
| L-Lys (300 μM)                    | 1.4 ± 0.0             | 0.5 ± 0.0** | 0.5 ± 0.0** | 0.5 ± 0.0** | 0.0237 ± 0.0004            | 0.0057 ± 0.0003**  | 0.0059 ± 0.0004**  | 0.0060 ± 0.0004**  |
| L-Arg (300 μM)                    | 2.2 ± 0.1             | 0.8 ± 0.0** | 0.8 ± 0.0** | 0.8 ± 0.0** | 0.0333 ± 0.0004            | 0.0107 ± 0.0003**  | 0.0114 ± 0.0004**  | 0.0118 ± 0.0004**  |
| L-Asp (3 mM)                      | 2.0 ± 0.1             | 2.0 ± 0.1   | 2.0 ± 0.1   | 1.9 ± 0.1   | 0.021 ± 0.001              | 0.022 ± 0.001      | 0.023 ± 0.001      | 0.023 ± 0.001      |
| L-Glu (3 mM)                      | 3.1 ± 0.1             | 2.5 ± 0.1** | 2.4 ± 0.1** | 2.5 ± 0.1** | 0.03533 ± 0.001            | 0.0233 ± 0.001**   | 0.0244 ± 0.001**   | 0.0221 ± 0.001**   |
| L-Asn (300 μM)                    | 1.6 ± 0.1             | 1.6 ± 0.0   | 1.6 ± 0.0   | 1.6 ± 0.0   | 0.0183 ± 0.001             | 0.0187 ± 0.001     | 0.0185 ± 0.001     | 0.0183 ± 0.001     |
| L-Gln (3 mM)                      | 1.5 ± 0.1             | 1.5 ± 0.1   | 1.5 ± 0.1   | 1.5 ± 0.0   | 0.0086 ± 0.0002            | 0.0090 ± 0.0002    | 0.0092 ± 0.0001    | 0.0090 ± 0.0002    |
| GABA (3 mM)                       | 1.5 ± 0.0             | 1.1 ± 0.0** | 1.1 ± 0.0** | 1.0 ± 0.0** | 0.0123 ± 0.001             | 0.0080 ± 0.0002*   | 0.0080 ± 0.0003*   | 0.0080 ± 0.0003*   |
| L-Cit (100 μM)                    | 1.6 ± 0.1             | 1.4 ± 0.1   | 1.5 ± 0.1   | 1.4 ± 0.1   | 0.028 ± 0.001**            | 0.023 ± 0.001**    | 0.023 ± 0.001**    | 0.024 ± 0.002**    |

Values are means ± SD; n = 12 individuals. Asterisks indicate significant differences as follows: \* P < 0.05, \*\* P < 0.01



**Table S10.** Phenotypes of *ZmVAAT3-OE* seedlings 12 days after transfer onto ATS medium supplemented with different amino acids and 3 mM NO<sub>3</sub><sup>-</sup>

| Treatment                         | Primary root length (cm) |                     |                     |                     | Average rosette leaves per plant |                     |                     |                     |
|-----------------------------------|--------------------------|---------------------|---------------------|---------------------|----------------------------------|---------------------|---------------------|---------------------|
|                                   | <i>Col-0</i>             | <i>ZmVAAT3-OE-1</i> | <i>ZmVAAT3-OE-2</i> | <i>ZmVAAT3-OE-3</i> | <i>Col-0</i>                     | <i>ZmVAAT3-OE-1</i> | <i>ZmVAAT3-OE-2</i> | <i>ZmVAAT3-OE-3</i> |
| 3 mM NO <sub>3</sub> <sup>-</sup> | 10.12 ± 0.12             | 10.21 ± 0.13        | 10.22 ± 0.12        | 10.13 ± 0.12        | 8.42 ± 0.14                      | 8.49 ± 0.22         | 8.33 ± 0.12         | 8.52 ± 0.08         |
| L-Gly (3 mM)                      | 5.11 ± 0.21              | 5.0 ± 0.22          | 5.12 ± 0.21         | 5.11 ± 0.22         | 8.22 ± 0.24                      | 7.11 ± 0.13 *       | 7.34 ± 0.17*        | 7.23 ± 0.14*        |
| L-Ala (3 mM)                      | 8.13 ± 0.11              | 13.22 ± 0.21**      | 13.11 ± 0.2**       | 13.01 ± 0.31**      | 8.33 ± 0.14                      | 7.36 ± 0.12*        | 7.24 ± 0.16*        | 7.33 ± 0.21*        |
| L-Val (300 μM)                    | 3.51 ± 0.22              | 5.12 ± 0.21*        | 5.21 ± 0.12*        | 5.22 ± 0.22*        | 8.11 ± 0.12                      | 7.22 ± 0.22*        | 7.33 ± 0.14*        | 7.14 ± 0.15*        |
| L-Leu (300 μM)                    | 3.32 ± 0.21              | 10.52 ± 0.23**      | 10.53 ± 0.23**      | 10.43 ± 0.24**      | 8.23 ± 0.12                      | 8.31 ± 0.13         | 8.25 ± 0.17         | 8.35 ± 0.13         |
| L-Ile (3 mM)                      | 3.71 ± 0.21              | 3.61 ± 0.12         | 3.61 ± 0.31         | 3.51 ± 0.22         | 7.52 ± 0.22                      | 5.34 ± 0.23**       | 5.32 ± 0.24**       | 5.31 ± 0.14**       |
| L-Ser (300 μM)                    | 5.81 ± 0.21              | 3.52 ± 0.12**       | 3.42 ± 0.16**       | 3.51 ± 0.21**       | 8.41 ± 0.14                      | 6.32 ± 0.22**       | 6.53 ± 0.24**       | 6.42 ± 0.14**       |
| L-Cys (3 mM)                      | 6.22 ± 0.22              | 5.51 ± 0.23*        | 5.42 ± 0.24*        | 5.52 ± 0.16*        | 8.21 ± 0.11                      | 7.24 ± 0.12*        | 7.33 ± 0.15*        | 7.50 ± 0.19*        |
| L-Thr (300 μM)                    | 4.22 ± 0.12              | 3.53 ± 0.13*        | 3.52 ± 0.12*        | 3.43 ± 0.12*        | 6.32 ± 0.22                      | 5.25 ± 0.14**       | 5.33 ± 0.12**       | 5.25 ± 0.17**       |
| L-Met (300 μM)                    | 3.81 ± 0.21              | 9.53 ± 0.22**       | 9.41 ± 0.22**       | 9.52 ± 0.13**       | 9.21 ± 0.21                      | 7.33 ± 0.14*        | 7.41 ± 0.13*        | 7.34 ± 0.12*        |
| L-Pro (100 μM)                    | 10.62 ± 0.22             | 10.71 ± 0.21        | 10.61 ± 0.23        | 10.72 ± 0.22        | 10.52 ± 0.22                     | 8.23 ± 0.12         | 8.32 ± 0.23         | 8.18 ± 0.13         |
| L-Phe (300 μM)                    | 8.21 ± 0.22              | 11.12 ± 0.22**      | 11.32 ± 0.21**      | 11.41 ± 0.22**      | 8.62 ± 0.21                      | 9.73 ± 0.23*        | 9.81 ± 0.17*        | 9.64 ± 0.12*        |
| L-Tyr (3 mM)                      | 5.32 ± 0.14              | 5.32 ± 0.13         | 5.43 ± 0.23         | 5.43 ± 0.23         | 6.24 ± 0.22                      | 6.32 ± 0.12         | 6.34 ± 0.24         | 6.61 ± 0.22         |
| L-Trp (3 mM)                      | 2.42 ± 0.12              | 2.03 ± 0.13         | 1.92 ± 0.13         | 2.02 ± 0.13         | 6.51 ± 0.23                      | 4.43 ± 0.22**       | 4.33 ± 0.21**       | 4.25 ± 0.16**       |
| L-His (300 μM)                    | 3.00 ± 0.10              | 2.51 ± 0.22*        | 2.62 ± 0.12*        | 2.42 ± 0.13*        | 8.53 ± 0.21                      | 6.32 ± 0.22**       | 6.38 ± 0.13**       | 6.51 ± 0.17**       |
| L-Lys (300 μM)                    | 2.10 ± 0.13              | 2.03 ± 0.12         | 2.03 ± 0.12         | 1.90 ± 0.12         | 7.23 ± 0.12                      | 5.32 ± 0.23**       | 5.37 ± 0.22**       | 5.38 ± 0.12**       |
| L-Arg (300 μM)                    | 8.31 ± 0.21              | 8.82 ± 0.12         | 8.92 ± 0.12         | 8.82 ± 0.12         | 8.33 ± 0.12                      | 8.24 ± 0.21         | 8.12 ± 0.11         | 8.37 ± 0.13         |
| L-Asp (3 mM)                      | 7.72 ± 0.12              | 7.62 ± 0.23         | 7.73 ± 0.23         | 7.71 ± 0.13         | 6.33 ± 0.16                      | 6.25 ± 0.12         | 6.32 ± 0.21         | 6.33 ± 0.22         |
| L-Glu (3 mM)                      | 8.52 ± 0.18              | 8.62 ± 0.25         | 8.72 ± 0.25         | 8.64 ± 0.25         | 9.25 ± 0.22                      | 7.09 ± 0.12**       | 7.33 ± 0.12**       | 7.42 ± 0.15**       |
| L-Asn (300 μM)                    | 8.62 ± 0.22              | 11.56 ± 0.23**      | 11.65 ± 0.34**      | 11.44 ± 0.24**      | 8.23 ± 0.16                      | 8.12 ± 0.19         | 8.09 ± 0.21         | 8.0 ± 0.13          |
| L-Gln (3 mM)                      | 13.12 ± 0.21             | 11.61 ± 0.22*       | 11.52 ± 0.21*       | 11.51 ± 0.23*       | 7.22 ± 0.12                      | 8.32 ± 0.22*        | 8.12 ± 0.12*        | 8.22 ± 0.12*        |
| GABA (3 mM)                       | 9.12 ± 0.12              | 7.24 ± 0.11**       | 7.13 ± 0.11**       | 7.32 ± 0.12**       | 8.25 ± 0.15                      | 8.25 ± 0.21         | 8.33 ± 0.13         | 8.66 ± 0.12         |
| L-Cit (100 μM)                    | 9.22 ± 0.22              | 6.61 ± 0.21**       | 6.57 ± 0.22**       | 6.73 ± 0.22**       | 8.24 ± 0.13                      | 6.23 ± 0.12**       | 6.27 ± 0.13**       | 6.21 ± 0.17**       |

| Treatment                         | Rosette diameter (cm) |               |               |               | Fresh weight per plant (g) |                   |                   |                    |
|-----------------------------------|-----------------------|---------------|---------------|---------------|----------------------------|-------------------|-------------------|--------------------|
|                                   | <i>Col-0</i>          | ZmVAAT3-OE -1 | ZmVAAT3-OE -2 | ZmVAAT3-OE -3 | <i>Col-0</i>               | ZmVAAT3-OE -1     | ZmVAAT3-OE -2     | ZmVAAT3-OE -3      |
| 3 mM NO <sub>3</sub> <sup>-</sup> | 1.7 ± 0.00            | 1.7 ± 0.00    | 1.7 ± 0.00    | 1.7 ± 0.00    | 0.0213 ± 0.001             | 0.0227 ± 0.001    | 0.0210 ± 0.001    | 0.0228 ± 0.002     |
| L-Gly (3 mM)                      | 1.4 ± 0.1             | 1.1 ± 0.0**   | 1.1 ± 0.0**   | 1.1 ± 0.0**   | 0.0100 ± 0.003             | 0.0097 ± 0.0003   | 0.0094 ± 0.0002   | 0.0093 ± 0.0003    |
| L-Ala (3 mM)                      | 1.2 ± 0.10            | 1.6 ± 0.10**  | 1.6 ± 0.10**  | 1.7 ± 0.10**  | 0.0210 ± 0.002             | 0.0223 ± 0.003    | 0.0225 ± 0.003    | 0.0224 ± 0.004     |
| L-Val (300 μM)                    | 1.8 ± 0.1             | 1.5 ± 0.0**   | 1.5 ± 0.0**   | 1.5 ± 0.0**   | 0.0153 ± 0.002             | 0.0155 ± 0.002    | 0.0152 ± 0.003    | 0.0155 ± 0.003     |
| L-Leu (300 μM)                    | 1.6 ± 0.1             | 1.5 ± 0.10    | 1.5 ± 0.10    | 1.5 ± 0.10    | 0.0253 ± 0.001             | 0.0257 ± 0.001    | 0.0240 ± 0.001    | 0.0248 ± 0.002     |
| L-Ile (3 mM)                      | 1.6 ± 0.20            | 0.5 ± 0.00**  | 0.5 ± 0.00**  | 0.5 ± 0.00**  | 0.0220 ± 0.003             | 0.004 ± 0.001**   | 0.004 ± 0.001**   | 0.004 ± 0.001**    |
| L-Ser (300 μM)                    | 1.5 ± 0.1             | 1.1 ± 0.1**   | 1.1 ± 0.0**   | 1.1 ± 0.1**   | 0.0127 ± 0.0004            | 0.0057 ± 0.0003** | 0.0056 ± 0.0002** | 0.0053 ± 0.0003**  |
| L-Cys (3 mM)                      | 1.8 ± 0.10            | 1.9 ± 0.10    | 1.9 ± 0.10    | 2.0 ± 0.10    | 0.0303 ± 0.0003            | 0.0190 ± 0.0002** | 0.0188 ± 0.0002** | 0.0190 ± 0.0002**  |
| L-Thr (300 μM)                    | 1.5 ± 0.10            | 1.4 ± 0.10    | 1.4 ± 0.10    | 1.4 ± 0.10    | 0.0173 ± 0.0001            | 0.0157 ± 0.0001   | 0.0156 ± 0.0002   | 0.0157 ± 0.0001    |
| L-Met (300 μM)                    | 1.5 ± 0.1             | 1.3 ± 0.1     | 1.3 ± 0.10    | 1.3 ± 0.10    | 0.0103 ± 0.0003            | 0.0173 ± 0.0002** | 0.0162 ± 0.0003** | 0.0170 ± 0.0003**  |
| L-Pro (100 μM)                    | 1.8 ± 0.2             | 1.9 ± 0.1     | 1.9 ± 0.1     | 1.8 ± 0.1     | 0.018 ± 0.001              | 0.027 ± 0.001**   | 0.025 ± 0.002**   | 0.027 ± 0.001**    |
| L-Phe (300 μM)                    | 1.3 ± 0.10            | 1.3 ± 0.0     | 1.3 ± 0.10    | 1.2 ± 0.10    | 0.0123 ± 0.001             | 0.0163 ± 0.001*   | 0.0162 ± 0.001*   | 0.0161 ± 0.001*    |
| L-Try (3 mM)                      | 2.1 ± 0.10            | 1.8 ± 0.10    | 1.8 ± 0.20    | 1.8 ± 0.10    | 0.0117 ± 0.0003            | 0.0114 ± 0.0003   | 0.0115 ± 0.0003   | 0.0111 ± 0.0003    |
| L-Trp (3 mM)                      | 0.7 ± 0.00            | 0.3 ± 0.00**  | 0.3 ± 0.00**  | 0.3 ± 0.00**  | 0.0067 ± 0.0002            | 0.0020 ± 0.0001** | 0.0020 ± 0.0001** | 0.0020 ± 0.0001**  |
| L-His (300 μM)                    | 1.1 ± 0.1             | 0.8 ± 0.0*    | 0.8 ± 0.0*    | 0.8 ± 0.0*    | 0.0111 ± 0.001             | 0.0053 ± 0.0002** | 0.0050 ± 0.0002** | 0.0058 ± 0.0001**  |
| L-Lys (300 μM)                    | 1.0 ± 0.10            | 0.7 ± 0.00**  | 0.7 ± 0.00**  | 0.7 ± 0.00**  | 0.029 ± 0.001**            | 0.006 ± 0.0**     | 0.006 ± 0.0**     | 0.006 ± 0.0**      |
| L-Arg (300 μM)                    | 2.0 ± 0.10            | 2.0 ± 0.10    | 2.0 ± 0.10    | 1.8 ± 0.10    | 0.0200 ± 0.0002            | 0.0183 ± 0.0002   | 0.0181 ± 0.0002   | 0.0184 ± 0.0002    |
| L-Asp (3 mM)                      | 1.8 ± 0.10            | 1.6 ± 0.20    | 1.6 ± 0.10    | 1.6 ± 0.10    | 0.024 ± 0.001              | 0.022 ± 0.001     | 0.023 ± 0.001     | 0.023 ± 0.001      |
| L-Glu (3 mM)                      | 2.3 ± 0.20            | 1.8 ± 0.1**   | 1.8 ± 0.10**  | 1.8 ± 0.10**  | 0.0277 ± 0.0002            | 0.0190 ± 0.0002** | 0.0182 ± 0.0002** | 0.0193 ± 0.0002**  |
| L-Asn (300 μM)                    | 1.4 ± 0.10            | 1.5 ± 0.10    | 1.5 ± 0.10    | 1.5 ± 0.10    | 0.0140 ± 0.0002            | 0.0173 ± 0.0003*  | 0.0171 ± 0.0002*  | 0.0178 ± 0.0002*   |
| L-Gln (3 mM)                      | 2.0 ± 0.20            | 1.5 ± 0.10**  | 1.5 ± 0.10**  | 1.5 ± 0.10**  | 0.0136 ± 0.0002            | 0.0100 ± 0.0002*  | 0.0102 ± 0.0001*  | 0.0100 ± 0.0002*   |
| GABA (3 mM)                       | 1.9 ± 0.10            | 1.9 ± 0.20    | 1.8 ± 0.10    | 1.8 ± 0.10    | 0.0170 ± 0.0003            | 0.0130 ± 0.0003*  | 0.0130 ± 0.0003*  | 0.01300 ± 0.0003** |
| L-Cit (100 μM)                    | 1.4 ± 0.1             | 0.9 ± 0.10**  | 0.9 ± 0.00**  | 0.9 ± 0.10**  | 0.0113 ± 0.0004            | 0.0120 ± 0.0002   | 0.0094 ± 0.0002   | 0.0092 ± 0.0002    |

Values are means ± SD; n = 12 individuals. Asterisks indicate significant differences as follows: \* P < 0.05, \*\* P < 0.01

**Table S11.** *Effects of different amino acids on growth parameters of ZmAAP4-OE and ZmVAAT3-OE arabidopsis seedlings*

| Parameter           | Effect   | Amino acids                                                                          |                                                                                |
|---------------------|----------|--------------------------------------------------------------------------------------|--------------------------------------------------------------------------------|
|                     |          | ZmAAP4-OE                                                                            | ZmVAAT3-OE                                                                     |
| Root length         | Positive | -                                                                                    | Leu, Ala, Val, Phe, Met, Arg, Asn, Glu                                         |
|                     | Negative | Gly, Val, Cys, Thr, Cit, Leu, Ile, Met, Pro, Trp, Phe, His, Lys, Arg, Glu, Gln, GABA | Ser, Cys, Thr, Trp, Lys, Gln, Cit, GABA, His                                   |
| Rosette leaf number | Positive | Met, Tyr, Asp, Glu, Asn                                                              | Leu, Phe, Tyr, Gln,                                                            |
|                     | Negative | Gly, Ala, Val, Leu, Ile, Ser, Cys, Thr, Pro, Phe, Trp, His, Lys, Arg, Gln, Cit, GABA | Gly, Ala, Val, Ile, Ser, Cys, Thr, Met, Pro, Trp, His, Lys, Arg, Glu, Asn, Cit |
| Rosette diameter    | Positive | Ala                                                                                  | Ala                                                                            |
|                     | Negative | Gly, Val, Ile, Ser, Cys, Met, Phe, Tyr, Trp, Lys, Arg, Glu, GABA                     | Gly, Val, Ile, Ser, Tyr, Trp, His, Lys, Glu, Gln, Cit                          |
| Fresh weight        | Positive | Ala, Leu                                                                             | Met, Pro, Phe, Asn                                                             |
|                     | Negative | Gly, Val, Ile, Ser, Cys, Thr, Met, Pro, Phe, Tyr, Trp, His, Lys, Arg, Glu, GABA, Cit | Ile, Ser, Cys, Trp, His, Lys, Arg, Glu, Gln, GABA                              |

## Supplementary dataset 1. Coding sequences and functional domains of *ZmAAP4* and *ZmVAAT3*

Coding sequences of two amino acid transporters (the sequence from the start codon “ATG” to the stop codon “TGA” or “TAG” were subcloned into the overexpression vector for gene overexpression) and illustration of their functional domains (Tusnády and Simon, 1998; 2001).

### ***ZmAAP4* (GRMZM2G110195\_T01):**

```
ATGGCGGAGAACAACGTCGTGGCCACGTACTACTACCCGACGGCAGCGCC
GGCGGCCATGGAGGTCTGCGGGCGCGGAGCTCGGCCAGGGCAAGCCCGAC
AAGTGCTTCGACGACGATGGCCGCCCAAGCGCAATGGGACGATGTGGAC
GGCGAGCGCGCACATCATCACGGCGGTGATCGGCTCCGGGGTGCTCTCGC
TGGGGTGGGCCATCGCGCAGCTCGGCTGGGTGGCCGGACCCGTCGTCATG
CTGCTCTTCTCGCTCGTCACCTACTACACCTCGTCGCTGCTCGCAGACTGC
TACCGCTCCGGCGACCCAGCACCGGCAAGCGGAACTACACCTACATGGA
CGCCGTCAACGCGAACCTCAGTGGCATCAAGGTCCAGATCTGCGGGTTCC
TGCAGTACGCCAACATCGTGGGCGTGGCCATCGGCTACACCATCGCTGCC
TCCATTAGCATGCTCGCGATCAGGAGGGCCAACTGCTTCCACCAGAAGGG
ACACGGCAACCCCTGCAAGATCTCCAGCACGCCCTACATGATCATCTTCG
GCGTGGCGGAGATCTTCTTCTCGCAGATCCCGGACTTCGACCAGATCTCCT
GGCTCTCCATCCTCGCCGCCGTCATGTCCTTACCTACTCCTCCATTGGGC
TCGGCCTGGGCGTTCGTCGAAGTCATCGCGAACAGAGGGCGTGCAGGGCAGC
CTGACCGGCATCACCATCGGCGTGGTGACCCCGATGGACAAGGTGTGGCG
CAGCCTCCAGGCGTTCGGCGACGTCGCCTTCGCCTACTCCTACTCCCTCAT
CCTGATCGAGATCCAGGACACCATCCGGGGCGCCGCCGCGTCCGGAGTCGA
CGGTGATGAAGCGCGCCACGGTGGTGAGCGTGGCGGTACCACGCTCTTC
TACATGCTGTGCGGCTGCATGGGGTACGCGGCGTTCGGCGACGGCGCGCC
CGGGAACCTCCTCACGGGCTTCGGCTTCTACGAGCCCTTCTGGCTCCTGGA
CGTGGCCAACGCCGCCATCGTGGTCCACCTGGTCGGCGCCTACCAGGTCT
ACTGCCAGCCGCTGTTCGCCTTCGTGGAGAAGTGGGCGCGCAGCGGTGG
CCGACTCGGCGTACATACCGGGGAGGTTCGAGGTCCCCTCCCGCTCCC
GGCGAGCCGGCGGCGGTGCTGCAAGGTGAACCTGTTCCGGGGCGACGTGGC
GGACGGCGTTCGTCGTGGCCACGACGGTCGTGTCCATGCTGCTGCCCTTCT
TCAACGACGTGGTGGGCTTCTGGGCGCGCTCGGCTTCTGGCCGCTCACC
GTCTACTTCCCCGTCGAGATGTACGTGGTGCAGAAGAAGGTGCCGCGGTG
GAGCTCCCGGTGGGTGTGCCTGCAGATGCTCAGCCTCGGCTGCCTCGTCAT
CTCCATCGCCGCCGACGCCGGTCCATCGCCGGCATCGCGTCCGACCTCA
AAGTCTACCGCCCGTTCAAGTCTACTGA
```

**Illustration of 12 transmembrane domains of ZmAAP4.** Locations of transmembrane helices (from left to right): 51-67, 74-90, 139-155, 174-190, 199-223, 230-246, 255-271, 290-309, 336-360, 403-419, 424-440, 459-483.

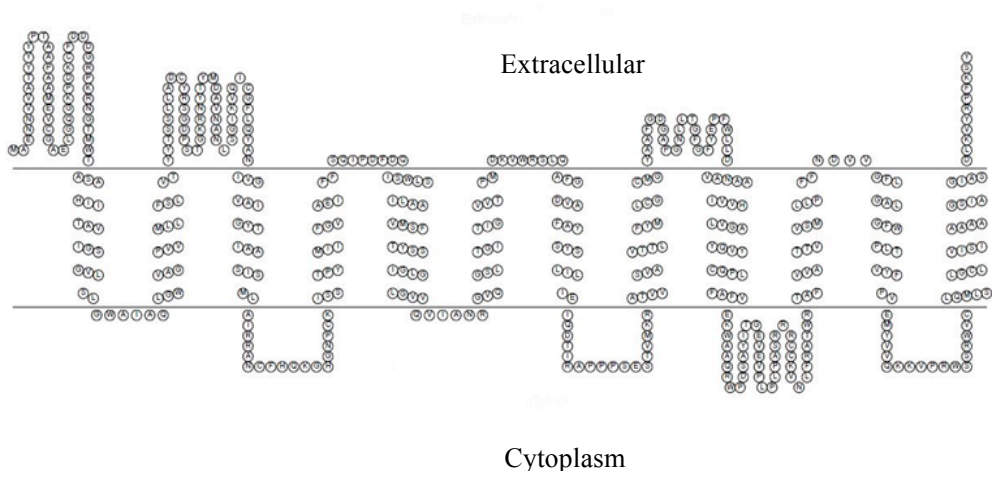

***ZmVAAT3* (GRMZM2G080843\_T01):**

ATGGCGGCGGCGGAGGAGGAGGAGGAGTGGGAGGATGGGCGTTCGGTGA  
TGCCGGAGGAGGAGGACGGAGACATCGAGGACGTCCCACCGCCGCCGT  
GCTAGGCAGGAACTTCGGCAGCGAGGACGAGGACGAGGACGAGGCCGGGC  
TCGTTGAACTCCCAGTCCCAGTGGTGGCCGCGGAGCTTCCGGGAAGCGAC  
TGACACCTATAACCATTGCCGCGCCCCGGGCCTCCGTCACCTCGTCGTCGG  
TGACTGCAATGGCCTGGGCTCTGACCTGAAGCTGCCTCTTCTGTTCGGACAA  
GCTAGATGGGAGGCAAGATTCATCCAACAACCTTGCTGCCAGTAGCAGACC  
CCTTCGGTTCAGTGCTAAGCGACGGGAGATTCTCAGATAGAGTGCAACAA  
GCCCCAACCACTCCAGGATGCAATCTGACGCAAACCGTGTTCAATGGGGT  
CAACGTGCTTGCTGGCATTGGCATTCTCTGCTCCATACACGATTCGTGA  
GGCCGGATGGGCCAGCCTTGTGGTCTGGCTTTTTTCGCTGTGGTGTGCTG  
CTACACTGGAGTCTTCTAAAGTACTGCTTTGAGAGCAAAGATGGTGTCA  
AAACTTTCCCAGACATTGGGGAGCTTGCCTTTGGAAGGATCGGCCGGTTT  
CTCATTTCTATAGTTCTGTACACCGAGCTCTATTCCTTTTGTGTGGAGTTCG  
TTATTCTGGAAGGTGATAACCTGGCATCAATTTTCACGAGCACCCTTTTCG  
ATTGGAATGGGATTCATGCCGATGGCAGACATTTCTTTGGGATTCTATTTG  
CTCTTGTGTCTTACCCAGCGTGTGGTTGCGAGATCTTCGAGTAATATCTT  
ACCTTTCAGTGGGTGGTGTGTTTGAACCTCTTCTGGTTTTCTATCTGTTGG  
TGTAGTTGGTGCTACTGGCAACGTAGGGTTCCTTGGCAGGGAAAGCAG  
TGAAGTGGGATGGTATAACCATTTGCAATTGGCATTATGGTTTTTGTACG  
CTGGACACTCAGTGTTTCCAAATATCTATCAGTCAATGTCCGATCGCACCA  
AATTCAACAAGGCACTCTACATATGTTTTGCAATATGCACGACAATTTATG  
GCGCTATAGCTGTTATTGGCTACCTCATGTTTGGAGATAAGACTCTCTCAC  
AAATAACTTTGAATCTTCCGAAAGATTCATTTGTGGCAAAGTTGCACTGG  
GGACCACGGTGATCATTCTTTCACAAAATATTCTTTGGTGATAAACCCAT  
TGGCTCGGAGTATAGAAGAGTTGCGTCCAGAAGGGTTTTCTAACCGATAGA  
CTCTTCGCTGTTATGCTGCGTACTGCCATTGTTGCATCAACTCTATGTGTTG  
CCTTCTCCTGCCATTCTTTGGTCTTGTGATGGCTCTCATTGGGTCTCTTCT  
CAGTATACTTGTGGCGCTCATAATGCCTGCCCTGTGCTTCTGAAGATCGC  
TCGGAACAAAGCGACGCGCTTGCAGGTCATCGCAAGCGTCGCGACCGTGG  
TGCTGGGCTCCGTCTGCGCAGTTCCTTGGGACGTACAACCTCTATCGCCAAGA  
TAGCCGAAAGCTACTAG

**Illustration of 11 transmembrane domains of ZmVAAT3.** Locations of transmembrane helices (from left to right): 146-165, 170-190, 217-237, 262-278, 287-306, 327-346, 359-381, 402-422, 439-459, 464-487, 500-522.

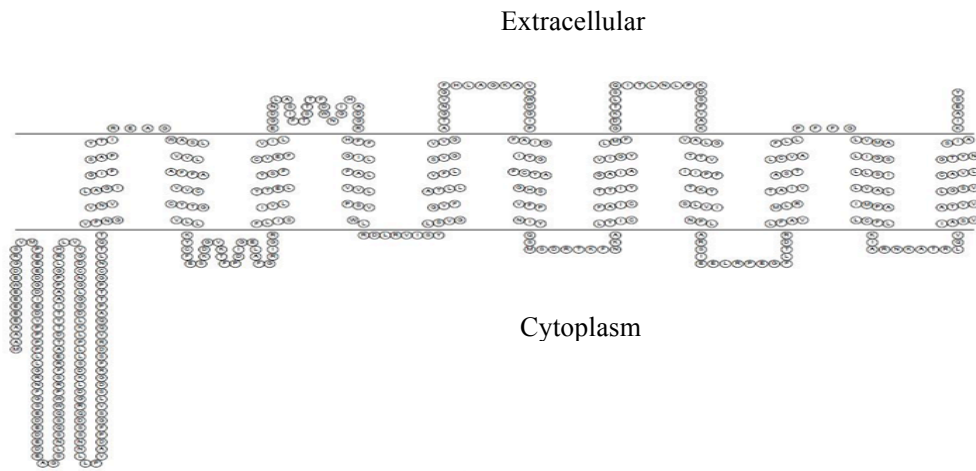

***References:***

**Tusnady GE, Simon I.** 1998. Principles governing amino acid composition of integral membrane proteins: application to topology prediction. *Journal of Molecular Biology* **283**, 489-506.

**Tusnady GE, Simon I.** 2001. The HMMTOP transmembrane topology prediction server. *Bioinformatics* **17**, 849-850.
